# Supplementary material for: Baseline Cytokine Profile Identifies a Favorable Outcome in a Subgroup of Colorectal Cancer Patients Treated with Regorafenib
Source: MDPI journal article supplement (doi:10.3390/vaccines11020335), 2023-02-02
Supplement: s1 [file s1]

Table S1. Metastatic sites.

Cluster 1

| Patient's Id | Liver | Lung | Lymphnodes | Peritoneum | Bone | Other |
|--------------|-------|------|------------|------------|------|-------|
| REG2         | X     | X    |            |            | X    |       |
| REG3         |       | X    | X          | X          |      |       |
| REG6         |       | X    |            | X          |      | X     |
| REG7         |       | X    |            |            |      |       |
| REG8         |       | X    |            |            |      |       |
| REG9         | X     |      | X          | X          |      |       |
| REG11        | X     | X    |            |            |      |       |
| REG17        | X     | X    | X          |            |      |       |
| REG19        | X     | X    | X          |            | X    |       |
| REG21        | X     |      |            | X          |      |       |
| REG22        | X     | X    |            |            |      |       |
| REG24        |       | X    |            | X          |      |       |
| REG26        | X     | X    |            |            |      |       |

Cluster2

| Patient's Id | Liver | Lung | Lymphnodes | Peritoneum | Bone | Other |
|--------------|-------|------|------------|------------|------|-------|
| REG1         |       |      |            | X          |      |       |
| REG4         | X     |      |            |            |      |       |
| REG5         | X     |      |            |            |      |       |
| REG10        | X     | X    | X          |            | X    |       |
| REG14        | X     | X    |            |            | X    |       |
| REG15        | X     | X    | X          |            |      |       |
| REG16        |       |      | X          |            | X    | X     |
| REG18        | X     | X    | X          |            |      |       |
| REG20        |       | X    |            | X          |      |       |
| REG23        | X     |      |            |            |      |       |
| REG25        | X     | X    | X          |            |      |       |

Cluster 3

| Patient's Id | Liver | Lung | Lymphnodes | Peritoneum | Bone | Other |
|--------------|-------|------|------------|------------|------|-------|
| REG13        | X     | X    | X          | X          |      | X     |

Table S2.ROC table analysis of variables confronting patients above median PFS compared to patients below median. Larger values of the test result variable(s) indicate stronger evidence for patients below median PFS.

| Test Result Variable(s) | Area Under the Curve |                         |                              | Asymptotic 95% Confidence Interval |             |
|-------------------------|----------------------|-------------------------|------------------------------|------------------------------------|-------------|
|                         | Area                 | Std. Error <sup>a</sup> | Asymptotic Sig. <sup>b</sup> | Lower Bound                        | Upper Bound |
| TGF- $\beta$            | .795                 | .098                    | .012                         | .602                               | .988        |
| TNF- $\alpha$           | .744                 | .113                    | .039                         | .522                               | .965        |
| VEGF                    | .494                 | .123                    | .957                         | .253                               | .734        |
| IFN- $\gamma$           | .558                 | .118                    | .624                         | .327                               | .788        |
| IL-2                    | .494                 | .121                    | .957                         | .257                               | .731        |
| IL-4                    | .580                 | .119                    | .497                         | .348                               | .812        |
| IL-5                    | .519                 | .121                    | .870                         | .282                               | .757        |
| IL-6                    | .808                 | .093                    | .009                         | .626                               | .990        |
| IL-8                    | .740                 | .101                    | .041                         | .542                               | .939        |
| IL-10                   | .766                 | .095                    | .024                         | .579                               | .953        |
| IL-12                   | .474                 | .119                    | .828                         | .242                               | .707        |
| IL-13                   | .689                 | .108                    | .109                         | .478                               | .900        |
| IL-15                   | .535                 | .121                    | .765                         | .298                               | .772        |
| IL-21                   | .096                 | .059                    | .001                         | .000                               | .212        |
| CCL-2                   | .109                 | .069                    | .001                         | .000                               | .244        |
| CCL-4                   | .574                 | .121                    | .532                         | .336                               | .812        |
| CCL-22                  | .545                 | .125                    | .703                         | .301                               | .789        |
| CXCL-10                 | .420                 | .127                    | .497                         | .171                               | .669        |

a. Under the nonparametric assumption

b. Null hypothesis: true area = 0.5
